# Supplementary material for: EphB4 and ephrinB2 act in opposition in the head and neck tumor microenvironment
Source: PubMed Central journal article supplement (PMC9209511; doi:10.1038/s41467-022-31124-7), 2022-06-20
Supplement: 41467_2022_31124_MOESM2_ESM.pdf [file 41467_2022_31124_MOESM2_ESM.pdf]

### **Description of Additional Supplementary Files**

#### **File name: Supplementary Data 1**

**Description:** Supplementary Data 1 include z-score values for the genes involved in the angiogenesis pathway demonstrated in the main Figure 5a.

#### **File name: Supplementary Data 2**

**Description:** Supplementary Data 2 include z-score values for the genes involved in the cell survival pathway demonstrated in the main Figure 5b.

#### **File name: Supplementary Data 3**

**Description:** Supplementary Data 3 include z-score values for the IFN-gamma related Ayer's inflammatory gene signature as shown in the main Figure 5c.
